# Supplementary material
Source: PubMed Central journal article supplement (PMC4998675)
Supplement: supp_116.235556_Supplemental_235556.pdf [file supp_116.235556_Supplemental_235556.pdf]

## **SUPPLEMENTAL INFORMATION**

### **Optimizing aryl amides that extend survival in prion-infected mice**

Kurt Giles, David B. Berry, Carlo Condello, Brittany N. Dugger, Zhe Li, Abby Oehler, Sumita Bhardwaj, Manuel Elepano, Shenheng Guan, B. Michael Silber, Steven H. Olson, and Stanley B. Prusiner

*Journal of Pharmacology and Experimental Therapeutics*

**Supplemental Table 1. Efficacy of imidazothiazoles in prion cell assay.** Mean EC<sub>50</sub> values and number of replicates (*n*) for compounds with the N-linked aryl imidazothiazole scaffold.

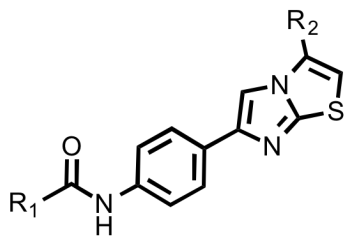

|           | R <sub>1</sub>      | R <sub>2</sub>     | EC <sub>50</sub> (μM) | <i>n</i> |
|-----------|---------------------|--------------------|-----------------------|----------|
| <b>25</b> | cPr                 | Me                 | > 10                  | 2        |
| <b>26</b> | cPr                 | CONMe <sub>2</sub> | > 10                  | 2        |
| <b>27</b> | CH <sub>2</sub> OMe | Me                 | > 10                  | 2        |

**Supplemental Table 2. Quantitation of spongiform degeneration in brains of treated mice.** Vacuolation scored by a skilled observer on a semiquantitative scale of 0–3 for each brain region.

| Mouse line | Inoculum | Compound  | <i>n</i> | Median vacuolation score (range) by brain region |              |           |              |            |             |
|------------|----------|-----------|----------|--------------------------------------------------|--------------|-----------|--------------|------------|-------------|
|            |          |           |          | Cortex                                           | Hippocampus  | Thalamus  | Hypothalamus | Cerebellum | Brainstem   |
| FVB        | none     | none      | 2        | 0                                                | 0            | 0         | 0            | 0          | 0           |
| FVB        | RML      | none      | 4        | 1 (0.5–1.5)                                      | 1            | 1.5 (1–2) | 0.5 (0–1)    | 3 (2–3)    | 2.5 (2–2.5) |
| FVB        | RML      | <b>1</b>  | 4        | 2 (1–3)                                          | 1.75 (1.5–2) | 2 (1–2)   | 1 (0.5–1)    | 0 (0–2)    | 2 (1–2)     |
| Tg4053     | RML      | none      | 7        | 1 (1–2)                                          | 1.5 (1–2)    | 1 (1–2)   | 1            | 2 (0–3)    | 2 (1–3)     |
| Tg4053     | RML      | <b>14</b> | 8        | 0 (0–3)                                          | 0.5 (0.5–3)  | 0.5 (0–1) | 1 (0–2)      | 0          | 1.5 (1–3)   |
| Tg4053     | RML      | <b>37</b> | 8        | 1 (0–2)                                          | 0.5 (0.5–3)  | 1 (0.5–2) | 1.5 (1–2)    | 0 (0–1)    | 2 (1–3)     |
| Tg4053     | RML      | <b>41</b> | 8        | 2 (0.5–3)                                        | 1 (0.5–3)    | 2 (1–3)   | 1.5 (0–3)    | 0          | 2 (1–3)     |

**Supplemental Table 3. Sensitivity of CAD5-RML[IND24] prions to aryl amides.** CAD5 cells infected with the RML[IND24] strain were incubated with aryl amides at concentrations up to 10  $\mu$ M for 5 days, then the level of PK-resistant PrP was determined. No reduction in PK-resistant PrP was observed with any compound.

| <b>Compound</b> | <b>EC<sub>50</sub> (<math>\mu</math>M)</b> |
|-----------------|--------------------------------------------|
| IND24           | > 20 <sup>a</sup>                          |
| <b>1</b>        | > 10                                       |
| <b>14</b>       | > 10                                       |
| <b>37</b>       | > 3.2 <sup>b</sup>                         |
| <b>41</b>       | > 10                                       |

<sup>a</sup>Data previously reported (Berry et al., 2013).

<sup>b</sup>Highest concentration tested was 3.2  $\mu$ M

## **SUPPLEMENTAL REFERENCE**

Berry DB, Lu D, Geva M, Watts JC, Bhardwaj S, Oehler A, Renslo AR, DeArmond SJ, Prusiner SB and Giles K (2013) Drug resistance confounding prion therapeutics. *Proc Natl Acad Sci USA* **110**:E4160–E4169.
